# Supplementary material for: Preferences Regarding Information Strategies for Digital Mental Health Interventions Among Medical Students: Discrete Choice Experiment
Source: PubMed Central journal article supplement (PMC11489795; doi:10.2196/55921), 2024-10-04
Supplement: formative_v8i1e55921_app4.pdf [file formative_v8i1e55921_app4.pdf]

## Multimedia Appendix

This is a Multimedia Appendix to a full manuscript published in JMIR Mental Health. For full copyright and citation information see <http://dx.doi.org/10.2196/jmir.55921>.

### Multimedia Appendix 4: Further information on latent class analysis.

Table S7: Information criteria for different number of classes in a latent class analysis within the framework of a discrete choice experiment to investigate preferences regarding information strategies for digital mental health interventions among medical students in Germany.<sup>a</sup>

| No. of classes | BIC <sup>b</sup> | cAIC <sup>c</sup> |
|----------------|------------------|-------------------|
| 2              | 2234.2606        | 2263.2606         |
| 3              | 2260.7319        | 2304.7319         |
| 4              | 2304.1565        | 2363.1565         |
| 5              | 2352.8563        | 2426.8563         |

<sup>a</sup>Results are based on participants who passed the reliability test.

<sup>b</sup>BIC = Bayesian information criterion.

<sup>c</sup>cAIC = consistent Akaike Information Criterion.

Table S8: Individual characteristics of participants who passed the reliability test (passed if a repeated ninth control choice set was answered identically in the discrete choice experiment) for class 1 and class 2, identified in a latent class analysis.<sup>a</sup>

| Variable                                        | Class 1<br>(N = 147) | Class 2<br>(N = 84) | Test <sup>b</sup><br>(p-value) |
|-------------------------------------------------|----------------------|---------------------|--------------------------------|
| <i>Gender</i>                                   |                      |                     | 0.508 <sup>c</sup>             |
| Women, N (share)                                | 104 (70.75%)         | 58 (69.05%)         |                                |
| Men, N (share)                                  | 43 (29.25%)          | 25 (29.76%)         |                                |
| Non-binary / third gender, N (share)            | 0 (0.00%)            | 1 (1.19%)           |                                |
| Age, mean (SD) <sup>e</sup>                     | 24.12 (3.70)         | 23.94 (4.28)        | 0.350 <sup>d</sup>             |
| Semesters, mean (SD)                            | 7.20 (3.33)          | 7.11 (3.47)         | 0.966 <sup>d</sup>             |
| <i>Passed exams</i>                             |                      |                     | 0.869 <sup>c</sup>             |
| No passed exam, N (share)                       | 52 (35.37%)          | 33 (39.29%)         |                                |
| M1, N (share)                                   | 73 (49.66%)          | 40 (47.62%)         |                                |
| M2, N (share)                                   | 21 (14.29%)          | 10 (11.90%)         |                                |
| M3, N (share)                                   | 1 (0.68%)            | 1 (1.19%)           |                                |
| <i>Self-assessed stress - previous semester</i> |                      |                     | 0.730 <sup>c</sup>             |
| 0 = "no stress at all", N (share)               | 0 (0.00%)            | 0 (0.00%)           |                                |
| 1, N (share)                                    | 7 (4.76%)            | 3 (3.57%)           |                                |
| 2, N (share)                                    | 4 (2.72%)            | 3 (3.57%)           |                                |
| 3, N (share)                                    | 16 (10.88%)          | 8 (9.52%)           |                                |
| 4, N (share)                                    | 10 (6.80%)           | 5 (5.95%)           |                                |
| 5, N (share)                                    | 14 (9.52%)           | 4 (4.76%)           |                                |
| 6, N (share)                                    | 15 (10.20%)          | 4 (4.76%)           |                                |
| 7, N (share)                                    | 26 (17.69%)          | 20 (23.81%)         |                                |
| 8, N (share)                                    | 30 (20.41%)          | 18 (21.43%)         |                                |
| 9, N (share)                                    | 15 (10.20%)          | 13 (15.48%)         |                                |

|                                                        |               |               |                    |
|--------------------------------------------------------|---------------|---------------|--------------------|
| 10 = "very stressed", N (share)                        | 10 (6.80%)    | 6 (7.14%)     |                    |
| <i>Self-assessed stress - currently</i>                |               |               | 0.085 <sup>c</sup> |
| 0 = "no stress at all", N (share)                      | 11 (7.48%)    | 6 (7.14%)     |                    |
| 1, N (share)                                           | 12 (8.16%)    | 8 (9.52%)     |                    |
| 2, N (share)                                           | 21 (14.29%)   | 15 (17.86%)   |                    |
| 3, N (share)                                           | 18 (12.24%)   | 5 (5.95%)     |                    |
| 4, N (share)                                           | 14 (9.52%)    | 2 (2.38%)     |                    |
| 5, N (share)                                           | 15 (10.20%)   | 4 (4.76%)     |                    |
| 6, N (share)                                           | 11 (7.48%)    | 8 (9.52%)     |                    |
| 7, N (share)                                           | 19 (12.93%)   | 13 (15.48%)   |                    |
| 8, N (share)                                           | 10 (6.80%)    | 12 (14.29%)   |                    |
| 9, N (share)                                           | 9 (6.12%)     | 2 (2.38%)     |                    |
| 10 = "very stressed", N (share)                        | 7 (4.76%)     | 9 (10.71%)    |                    |
| Familiar with DMHIs, N (share)                         | 55 (37.41%)   | 20 (23.81%)   | 0.041 <sup>c</sup> |
| Expected frequency of use - days per week, mean (SD)   | 2.31 (1.63)   | 2.01 (1.59)   | 0.110 <sup>d</sup> |
| Expected frequency of use - minutes per day, mean (SD) | 20.61 (15.54) | 22.26 (15.55) | 0.460 <sup>d</sup> |
| Willingness to pay, mean (SD)                          | 21.78 (21.13) | 24.48 (23.43) | 0.631 <sup>d</sup> |

<sup>a</sup>No missing data in individual characteristics.

<sup>b</sup>Test for differences in individual characteristics for participants of class 1 and class 2.

<sup>c</sup>Fisher's exact test.

<sup>d</sup>Mann-Whitney-U test.

<sup>e</sup>SD = standard deviation.
